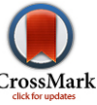

## Correction

# Correction: An Explosive Epidemic of DENV-3 in Cairns, Australia

## The PLOS ONE Staff

There is a missing grant number in the funding statement for this article. Please refer to the correct funding statement below:

Research at QHFSS was funded by an internal funds provided by Queensland Health and the US National Institutes of Health/NIGMS U01GM097661. The funders had no role in study design, data collection and analysis, decision to publish, or preparation of the manuscript.

## Reference

1. Ritchie SA, Pyke AT, Hall-Mendelin S, Day A, Mores CN, et al. (2013) An Explosive Epidemic of DENV-3 in Cairns, Australia. PLoS ONE 8(7): e68137. doi:10.1371/journal.pone.0068137

**Citation:** The PLOS ONE Staff (2014) Correction: An Explosive Epidemic of DENV-3 in Cairns, Australia. PLoS ONE 9(8): e105846. doi:10.1371/journal.pone.0105846

**Published:** August 8, 2014

**Copyright:** © 2014 The PLOS ONE Staff. This is an open-access article distributed under the terms of the Creative Commons Attribution License, which permits unrestricted use, distribution, and reproduction in any medium, provided the original author and source are credited.
